1 **Title: Infrared heater warming system markedly reduces dew**  
2 **formation: An overlooked factor in arid ecosystems**

3

4 Tianjiao Feng<sup>a,†</sup>, Lixu Zhang<sup>a,†</sup>, Qian Chen<sup>a</sup>, Zhiyuan Ma<sup>a</sup>, Hao Wang<sup>b</sup>, Zijian  
5 Shangguan<sup>a</sup>, Lixin Wang<sup>c</sup>, Jin-Sheng He<sup>a,b,\*</sup>

6 *<sup>a</sup>Institute of Ecology, College of Urban and Environmental Sciences, and Key*  
7 *Laboratory for Earth Surface Processes of the Ministry of Education, Peking*  
8 *University, Beijing 100871, China*

9 *<sup>b</sup>State Key laboratory of Grassland Agro-ecosystems, College of Pastoral Agriculture*  
10 *Science and Technology, Lanzhou University, Lanzhou 730020, China*

11 *<sup>c</sup>Department of Earth Sciences, Indiana University–Purdue University Indianapolis*  
12 *(IUPUI), Indianapolis, IN 46202, USA*

13

14

15

16

17 *†Co-first authors: Tianjiao Feng and Lixu Zhang have equal contribution to this study.*

18 *\*Corresponding author: Jin-Sheng He (jshe@pku.edu.cn):*

19 *State Key laboratory of Grassland Agro-ecosystems, College of Pastoral Agriculture*  
20 *Science and Technology, Lanzhou University, Lanzhou 730020, China*

21

22

23 **ABSTRACT**

24 Dew plays a vital role in ecosystem processes in arid and semi-arid regions  
25 and is expected to be affected by climate warming. Infrared heater warming  
26 systems have been widely used to simulate climate warming effects on  
27 ecosystem. However, how this warming system affects dew formation has been  
28 long ignored and rarely addressed. In a typical alpine grassland ecosystem on the  
29 Northeast of the Tibetan Plateau, we measured dew amount and duration by  
30 artificial condensing surfaces, leaf wetness sensors and *in situ* dew formation on  
31 plants from 2012 to 2017. We also measured plant traits related to dew  
32 conditions. The results showed that (1) warming reduced the dew amount by  
33 41.6%-91.1% depending on the measurement method, and reduced dew duration  
34 by 32.1 days compared to the ambient condition. (2) Different plant functional  
35 groups differed in dew formation. (3) Under the infrared warming treatment, the  
36 dew amount decreased with plant height, while under the ambient conditions, the  
37 dew amount showed the opposite trend. We concluded that warming with an  
38 infrared heater system greatly reduces dew formation, and if ignored, it may lead  
39 to overestimation of the effects of climate warming on ecosystem processes in  
40 climate change simulation studies.

41

42 *Key Words:* Alpine ecosystem; Climate warming; Dew formation; Tibetan Plateau

43

## 44 **1. Introduction**

45 Dew is considered a vital vegetative water source in semiarid and arid areas  
46 (Beysens, 1995; Agam and Berliner, 2006; Wang et al., 2017a). In such environments,  
47 dew plays an indispensable role on plants (Benasher et al., 2010; Zhuang and  
48 Ratcliffe, 2012; Oliveira, 2013), biological crusts (Zhang et al., 2009; Fischer et al.,  
49 2012; Kidron and Temina, 2013), small animals (Steinberger et al., 1989; Zheng et al.,  
50 2010) and plant-associated microorganisms (Agam and Berliner, 2006). Dew also has  
51 significant effects on relative humidity, vapor pressure deficits and nutrient cycling  
52 (Munné, 1999; Goldsmith et al., 2013; Wang et al., 2019), and these factors influence  
53 plant photosynthesis, transpiration and other important ecological processes  
54 (Benasher et al., 2010; Wang et al., 2017a).

55 Dew formation in ecosystems is affected by microclimatic parameters (e.g., air  
56 temperature, relative humidity and vapor pressure deficit) and plant morphological  
57 features (e.g., aboveground biomass, leaf area, leaf roughness and plant height). These  
58 factors change under different climatic conditions and are associated with different  
59 plant species or functional groups (Agam and Berliner, 2006; Hao et al., 2012). Thus,  
60 it is expected that rapidly changing climates will significantly affect dew formation  
61 (Walther et al., 2002; Xiao et al., 2013; Li et al., 2018).

62 To simulate climate warming, an infrared heater warming system is widely used  
63 to address the potential impacts of climate warming on ecosystems in the field (Liu et  
64 al., 2018; Song et al., 2019; Ettinger et al., 2019). However, there are differences  
65 between artificial warming and natural warming (Shaver et al., 2000) and the effects

66 of artificial warming have the potential to influence dew formation (Wolkovich et al.,  
67 2012; Moni et al., 2019).

68       Recently, there are increasing number of studies on dew research  
69 (Tomaszkiewicz et al., 2015; Wang et al., 2017a), most of which analyzed the  
70 ecological effects of dew on ecosystem processes, such as plant photosynthesis and  
71 transpiration in ecosystems (Ninari and Berliner, 2002; De Boeck et al., 2015; Wang  
72 et al., 2019), or compared the effects of environmental factors on dew formation (Hao  
73 et al., 2012; Ettinger et al., 2019; Beysens, 2016). There are also substantial efforts  
74 have been made to study the potential impacts of climate warming on dryland  
75 ecosystems by manipulating temperature in the field with various warming facilities  
76 (Kimball et al., 2018; Moni et al., 2019; Song et al., 2019). However, the effects of  
77 artificial warming on dew formation and ecosystem processes have not been  
78 addressed. As a result, the observed changes in ecological processes in various  
79 climate change studies are likely attributed, to some extent, to altered dew amounts,  
80 misrepresenting the effects of warming on ecosystem processes.

81       Few studies on dew research have been conducted in the context of climate  
82 change, and global warming experiments have not reported the effects of climate  
83 change or plant traits and functional groups on dew formation or even considered the  
84 effects of dew as a long-term factor affecting soils and plants as well as ecosystem  
85 processes during the course of climate change (Tomaszkiewicz et al., 2015; Li et al.,  
86 2018). On the other hand, few studies have investigated the influences of different  
87 plant traits or functional groups on dew amount and duration (Wang et al., 2012; Xu

88 et al., 2015; Tomaszewicz et al., 2016). Therefore, the impacts of artificial warming,  
89 plant traits and functional groups on dew formation urgently need to be revealed to  
90 better understand the impacts of warming on ecosystem processes (Korell et al.,  
91 2019).

92 Experimental data from field-based climate change experiments are crucial to  
93 determine mechanistic links between simulated climate change and dew formation.  
94 This study is a part of a comprehensive warming experiment in a typical alpine  
95 grassland in Tibet Plateau, where we measured the dew amount and duration by the  
96 methods of the artificial condensation surface, leaf wetness sensor and *in situ* plant  
97 dew formation measurement to explore the responses of dew formation among  
98 different functional groups to simulated climate warming. The objectives of the  
99 present study were to (1) address how the widely used infrared heater warming  
100 system affects dew amount and duration and (2) elucidate whether plant functional  
101 groups, which are expected to shift under future warming, affect dew formation under  
102 ambient and warming conditions. Our results will aid in the understanding of the  
103 characteristics of dew formation under a warming climate in the future.

104

## 105 **2. Materials and methods**

### 106 *2.1. Study site*

107 The study site was located at Haibei National Field Research Station of the  
108 Alpine Grassland Ecosystem (37°36' N, 101°19' E, 3215 m a.s.l.) in the northeastern  
109 part of the Tibetan Plateau, China. The mean annual air temperature and precipitation

110 were  $-1.2\text{ }^{\circ}\text{C}$  and  $489.0\text{ mm}$  during 1980-2014, respectively (Liu et al., 2018).  
111 Approximately 80% of the precipitation was concentrated in the growing season  
112 (from May to September). This mesic alpine grassland is dominated by *Stipa aliena*,  
113 *Elymus nutans* and *Helictotrichon tibeticum*. The soil is classified as a Mollisol  
114 according to USDA Soil Taxonomy. The average soil bulk density, organic carbon  
115 concentration and pH were  $0.8\text{ g}\cdot\text{cm}^{-3}$ ,  $63.1\text{ g}\cdot\text{kg}^{-1}$  and  $7.8$  at the 0-10 cm soil depth,  
116 respectively (Lin et al., 2016).

## 117 2.2. Warming experiment design

118 Our study was conducted within an experimental warming  $\times$  precipitation  
119 infrastructure within an area of  $50\text{ m} \times 110\text{ m}$  that was established in July 2011. The  
120 design of the experiment was detailed in Liu et al. (2018). In brief, the experiment  
121 manipulated the temperature ( $+2\text{ }^{\circ}\text{C}$ , control) and precipitation ( $+50\%$ , control,  $-50\%$ )  
122 with a completely randomized design. Each treatment had six replications with a plot  
123 area of  $2.2\text{ m} \times 1.8\text{ m}$  (Liu et al., 2018). The warming treatment was applied by two  
124 infrared heaters ( $220\text{ V}$ ,  $1200\text{ W}$ ,  $1.0\text{ m}$  long, and  $0.22\text{ m}$  wide) (Ma et al., 2017). In  
125 the current study, we only compared ambient and warming conditions.

126 Air temperature and relative humidity probes (VP-3, METER Group, Inc.,  
127 Pullman, WA, USA) were installed 30 cm above the soil surface within each plot. All  
128 data were automatically recorded hourly and stored in a data logger (EM50, METER  
129 Group, Inc., Pullman, WA, USA).

## 130 2.3. Dew formation measurements

131 We used three methods to measure dew amount and duration:

132           (1) **Artificial condensation surface:** The daily dew production was collected  
133 and measured using a preplaced plastic film, 20 cm × 20 cm in size, at each plot  
134 (Vuollekoski et al., 2015). The clean plastic films were weighed and placed at each  
135 plot at 20:00 pm (local time) the day before each measurement. At 6:00 am the next  
136 morning, the preplaced plastic films were weighed, and the differences in the weights  
137 were designated as the dew production (g) for that night. The dew amount (mm) was  
138 equal to the dew weight divided by the area of the plastic film. In this study, the dew  
139 amounts were measured by this method on sunny and windless days two times per  
140 week during the peak growing seasons (from July to September) in 2012 and 2013.

141           (2) ***In situ* dew formation measurements on plants:** Dew formation on  
142 plants was measured by sampling the outside plots to avoid disturbing the plant  
143 community composition of each plot. Similar individuals of the same species were  
144 chosen to measure dew formation. For each species, four or five individuals were  
145 selected, weighed, measured plant heights and placed into floral foam to prevent  
146 wilting the day before measurement and then placed at each plot at 20:00 pm (local  
147 time). At 6:00 am the next morning, these plants were weighed after being brought  
148 back to the laboratory to attain the total weight. The dew production (g) was equal to  
149 the total weight minus the plant fresh weight. At the same time, we scanned the leaf  
150 area of plants and finally calculated the dew amount (mm) produced per unit plant  
151 area. In this study, the dew amounts were measured by this method on sunny and  
152 windless days three times per week during the peak growing season (from July to  
153 September) in 2017.

154 (3) **Leaf wetness sensors:** The dew amount and duration were monitored hourly  
155 using leaf wetness sensors (S-LWA-M003, Onset Computer Corporation, Bourne,  
156 MA, USA) and a HOBO data logger (H21-002, Onset Computer Corporation,  
157 Bourne, MA, USA) at each plot from 2015 to 2017 (Chen 2015). The dew amount  
158 was calculated by the fitting relationship between the measured leaf wetness sensor  
159 readings and the actual condensed water amount (g). We sprayed water evenly on the  
160 leaf wetness sensors to induce water condensation on their surface, recorded the  
161 instrument reading, and established the relationship between the condensation amount  
162 and the leaf wetness sensor readings. In addition, the simulated solid condensation  
163 amount was determined using the same method in a -20 °C refrigerator to establish a  
164 relationship curve. We repeated the above steps multiple times to ensure a wide range  
165 of leaf wetness sensor readings. The relationship curve between the leaf wetness  
166 sensor readings and the condensation amount was fitted (Fig. S1), and the relationship  
167 was as follows:

$$168 \quad D = (0.00005 \times Rl^2 + 0.0001 \times Rl) / S, R^2 = 0.71, p < 0.001,$$

169 where  $D$  is the dew amount (mm),  $Rl$  is the leaf wetness sensor reading and  $S$  is  
170 the area of the leaf wetness sensor, which was 4.7 cm × 5.1 cm.

171 In our study, the former two measurement methods focused on dew amount,  
172 while only the leaf wetness sensor method measured the dew duration. The data were  
173 automatically recorded hourly, and dew duration was calculated as the number of days  
174 for which dew was recorded between 8:00 p.m. and 6:00 a.m. of the next morning  
175 during the measuring periods.



## 176 2.4. Dew formation and aboveground biomass at the species level

177 In total, we measured dew formation at the species level for 10 species. These  
178 ten species accounted for approximately 72% of the total community biomass (Liu et  
179 al., 2018). We divided these plant species into three functional groups, i.e., grasses  
180 (*Stipa aliena*, *Elymus nutans* and *Helictotrichon tibeticum*), forbs (*Tibetia himalaica*,  
181 *Oxytropis ochrocephala*, *Medicago ruthenica*, *Gentiana straminea* and *Saussurea*  
182 *pulchra*), and sedges (*Kobresia humilis* and *Carex przewalskii*) and separately  
183 analyzed their dew formation responses to warming. The aboveground biomass was  
184 separated into grasses, sedges, and forbs, harvested and oven-dried at 65 °C to a  
185 constant weight. Plant height was measured using five selected individuals per species  
186 in each plot before dew formation measurement during the experimental periods.

## 187 2.5. Data Analysis

188 Based on long-term meteorological observations, the dew point temperature was  
189 calculated by Penman-Monteith equation with the following function (Allen et al.,  
190 1998):

$$\begin{aligned} 191 \quad T_{\text{dew}} &= \frac{116.91 + 237.3 \ln(e_a)}{16.78 - \ln(e_a)} \\ 192 \quad e_a &= \frac{\text{RH}}{100} e^{\circ}(T) \\ 193 \quad e^{\circ}(T_a) &= 0.6108 \exp\left[\frac{17.27T}{T+237.3}\right], \end{aligned}$$

194 where  $T_{\text{dew}}$  is dew point temperature [°C],  $e_a$  is actual vapour pressure [kPa],  $e^{\circ}$   
195 (T) is saturation vapor pressure at the air temperature  $T_a$  [kPa], and  $T_a$  is air  
196 temperature [°C]. Meanwhile, the temperature differences ( $T_a - T_{\text{dew}}$ ) was calculated by  
197 the difference between the air temperature ( $T_a$ ) and dew point temperature ( $T_{\text{dew}}$ ) to

198 represent the difficult degrees of dew formation.

199       The dew point temperature was calculated using long-term meteorological  
200 observations. Linear regression was used to test the relationship between plant height  
201 and dew amount in the control and warming treatments. To test the warming effect,  
202 one-way analysis of variance (ANOVA) and Tukey's HSD test were used to  
203 determine differences in dew amount and duration between the control and warming  
204 plots. All statistical analyses were conducted using R 3.2.2 software (R Foundation  
205 for Statistical Computing, Vienna, Austria, 2013). Differences were considered  
206 significant at  $P < 0.05$  unless otherwise stated.

207

## 208 **3. Results**

### 209 *3.1. Effects of warming on the dew formation*

210       The multiple measurement methods showed decreased dew amounts under  
211 warming conditions. Warming resulted in average decreases of 91.7%, 83.9% and  
212 41.6% in dew amount by the artificial condensation surface method, the in situ dew  
213 formation on plants and the leaf wetness sensors, respectively (linear mixed-effects  
214 model:  $P < 0.001$ ; Fig. 1). From 2015 to 2017, warming significantly decreased the  
215 dew duration by an average of 10.3% (linear mixed-effects model:  $P < 0.001$ ; Fig.  
216 2a). Therefore, warming reduced the total dew formation by not only reducing the  
217 daily dew amounts (mm/day) but also the dew duration (days). The results also  
218 showed that warming significantly increased the temperature differences ( $T_a - T_{dew}$ ) by  
219 3.8% ( $P < 0.001$ ; Fig. 2b), which made dew formation more difficult. Furthermore,

220 the differences in the dew amount between the control and warming treatments  
221 ( $D_{\text{control}} - D_{\text{warming}}$ ) showed significant differences at the seasonal scale (Fig. 2c). The  
222 dew amounts under the warming treatment decreased by an average of 0.05 mm (up  
223 to 64.5%) during the growing seasons and only decreased by an average of 0.006 mm  
224 (only 27.5%) in non-growing seasons (Fig. 2c).

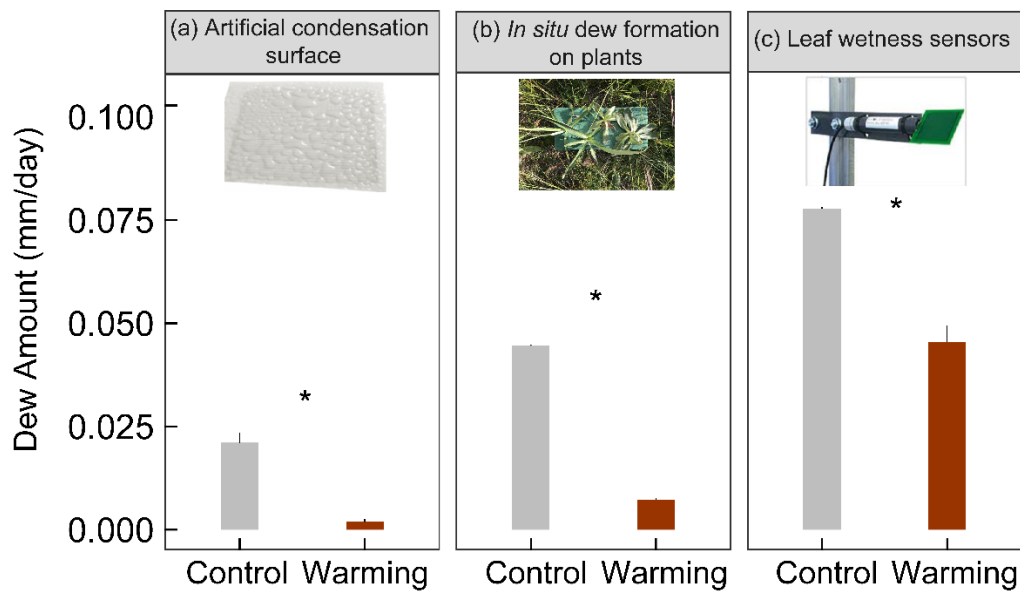

225  
226 Fig. 1. The dew amount measured by (a) artificial condensation surface, (b) *in situ*  
227 dew formation on plants and (c) leaf wetness sensors in control and warming  
228 treatments during the experimental period.

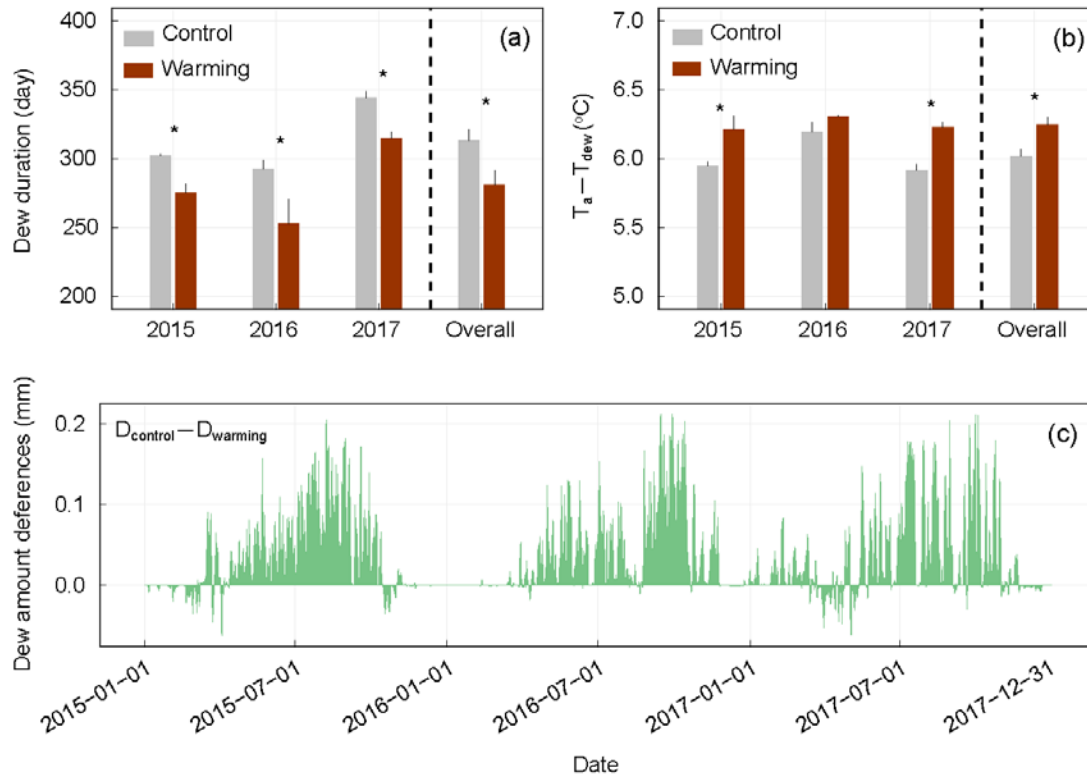

229

230 Fig. 2. Warming effects on (a) dew duration, (b) the difference between the air  
231 temperature ( $T_a$ ) and dew point temperature ( $T_{dew}$ ) and (c) the differences of dew  
232 amount between the control and warming treatment. \* indicates statistically  
233 significant at  $P < 0.001$ .

234 3.2. *Effects of warming on dew amount among different functional groups*

235 The total aboveground biomass and dew amounts among each functional group  
236 were measured by *in situ* dew formation measurements on plants in this study. The  
237 results showed that different plant functional groups significantly differed in dew  
238 formation and warming significantly decreased the dew amount among each  
239 functional group (a reduction of 83.5%, 71.6%, 97.6% and 87.0% for sedges, forbs,  
240 grasses and all species combined, Fig. 3a), while it slightly changed the aboveground  
241 biomass of different functional groups (Fig. 3b).

242

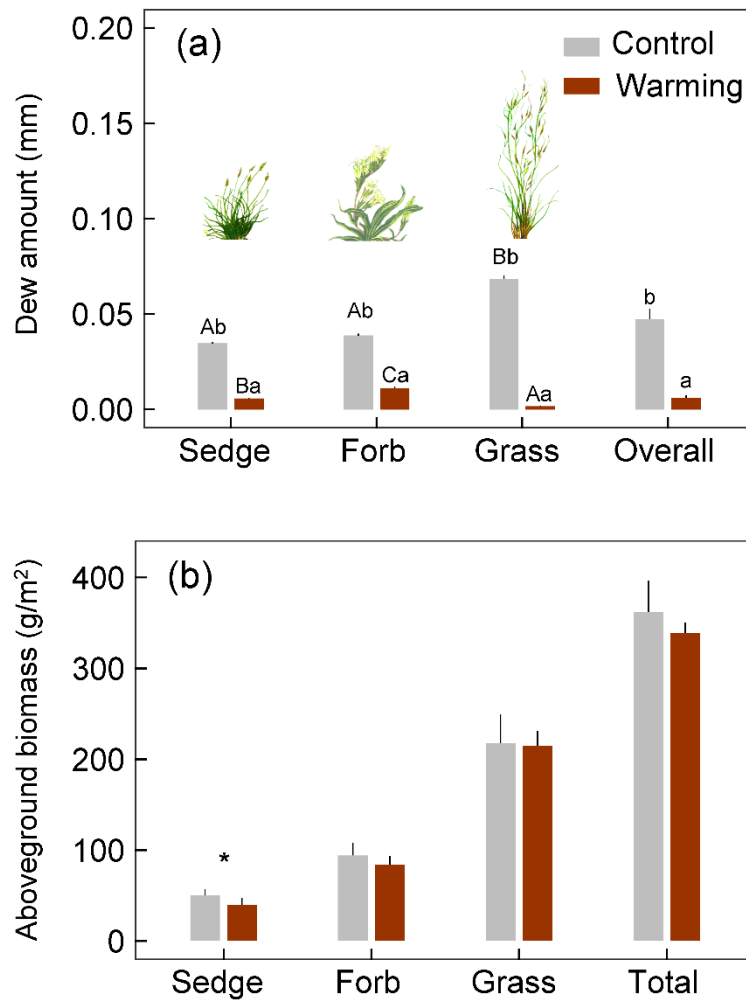

243

244 Fig. 3. Warming effects on (a) dew amount and (b) aboveground biomass of different

245 functional groups. Different uppercase letters indicate significant difference in

246 different functional groups ( $P < 0.05$ ) and different lowercase letters indicate

247 significant difference in control and warming treatments ( $P < 0.05$ ).

248 3.3. Effects of warming on the relationships between plant height and  
249 dew amount

250 Compared with the control treatment, the warming treatment significantly  
251 affected the relationship between plant height and dew amount ( $P < 0.001$ ,  $n=60$ ; Fig.  
252 4). In the control treatment, linear regression revealed that the dew amount was  
253 significantly positively correlated with plant height ( $R^2 = 0.35$ ,  $P < 0.001$ ; Fig. 4a).  
254 However, dew amount was significantly negatively correlated with plant height ( $R^2 =$   
255  $0.34$ ,  $P < 0.001$ ; Fig. 4b) in the warming treatment.

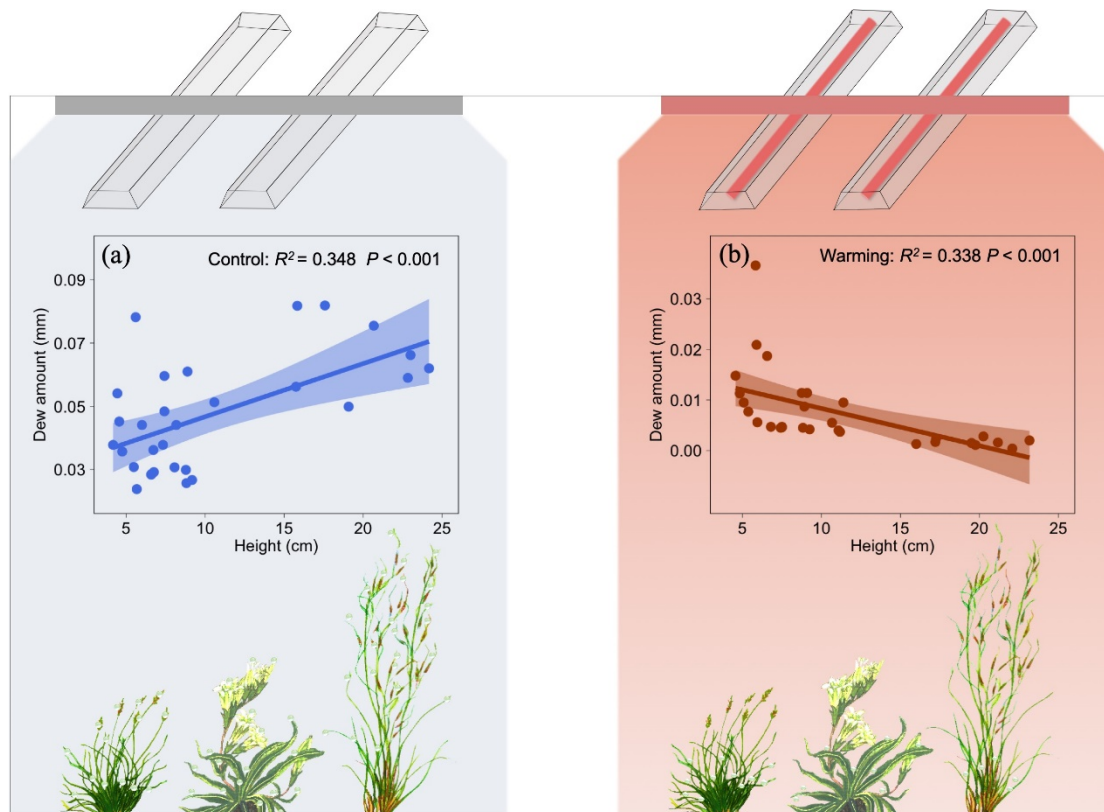

256  
257 Fig. 4. The relationships between plant height and dew amount in control and  
258 warming plots.

259

## 260 **4. Discussion**

### 261 *4.1. Warming reduces dew amount and changes seasonal patterns of dew* 262 *formation*

263       Using three distinct measurement methods, our study showed that warming  
264 significantly reduces dew amount (Fig. 1), which may have substantial impacts on  
265 plant growth especially during the dry period in the alpine and dryland ecosystems  
266 (Stone, 1957; Jacobs et al., 2006; Benasher et al., 2010; Rodney et al., 2013).  
267 Warming can reduce dew formation in two ways: by hindering dew condensation and  
268 shortening dew retention. Warming can hinder the dew condensation processes by  
269 decreasing the air humidity and increasing evaporation (Oliveira 2013; Scheff and  
270 Frierson, 2014; Li et al., 2018). Additionally, warming changes the air temperature,  
271 dew point temperature and dew point depression (Fig. 2b), which makes it more  
272 difficult for the air temperature to approach the dew point temperature (Beysens,  
273 1995; Jacobs et al., 2006; Mortuza et al., 2014). Warming can also accelerate the dew  
274 evaporation process (Xiao et al, 2013). Dew droplets lasted for a shorter period of  
275 time under warmer temperatures, which also led to a lower dew duration or amount  
276 (Xu et al., 2015).

277       In this study, we found that warming not only reduces dew formation but also  
278 changes its seasonal variation (Fig. 2). Therefore, plants growing under water stress  
279 would have higher risks of not surviving under warming conditions (Rodney et al.,  
280 2013; Tomaszewicz et al., 2017). Overall, under the rapidly changing climate,  
281 changes in dew formation should be considered an important environmental factor



282 and should not be neglected in arid and cold regions.

283 *4.2. Dew formation varied among different functional groups under*  
284 *warming*

285 Functional groups create different microenvironments and have different water  
286 use strategies to influence the dew production and absorption by plants (Zhuang and  
287 Zhao, 2017; Wang et al., 2019). Environmental conditions, such as temperature,  
288 relative humidity and wind speed, change due to various micromorphological features  
289 and distribution patterns among different functional groups (Agam and Berliner  
290 2006), affecting dew formation and duration (Ninari and Berliner 2002). Our results  
291 showed that different functional groups had different degrees of dew formation,  
292 consistent with our expectations.

293 To date, few studies have investigated how biotic factors (e.g., plant traits and  
294 functional groups) affect dew formation. Here, we examined the effects of plant traits  
295 (i.e., plant height and aboveground biomass) on dew formation in different plant  
296 functional groups (sedges, forbs and grasses) and found that sedges and forbs with  
297 shorter heights are associated with less dew than grasses with taller heights under  
298 natural conditions (Fig. 3). Because under ambient conditions, the upper canopy air  
299 temperature is lower at night due to this area receiving less land-surface radiation,  
300 dew formation occurs earlier in higher leaves, such as those of grasses (Zhang et al.,  
301 2009; Wang et al., 2017a). In addition, the dominant taller species (*Stipa aliena*,  
302 *Elymus nutans*, and *Helictotrichon tibeticum*) usually have more aboveground  
303 biomass (Konrad et al., 2015; Ma et al., 2017) than shorter species, which can

304 facilitate dew formation and retention (Pan et al., 2010). Additionally, the dew water  
305 stored within a dense canopy can be preserved for a longer period of time through the  
306 reduction in evaporation (Xiao et al., 2013).

307 Under warming conditions, the aboveground biomass and plant height increased,  
308 and the community composition changed with a higher prevalence of grass in the  
309 alpine ecosystems (Liu et al., 2018). Such changes should be beneficial for dew  
310 formation based on our findings under ambient conditions (i.e., results from the  
311 control plots, Fig. 4a). However, a substantial reduction in dew formation was  
312 observed under the warming treatments (Fig. 1 and Fig. 2). In addition, we found that  
313 warming resulted in a lower dew amount on taller plants, in contrast to the results  
314 under ambient conditions (Fig. 4). Warming changed the relationship between plant  
315 height and dew amount in both direct and indirect ways. Warming directly affected  
316 the air temperature profile and made dew formation more difficult (Wolkovich et al.,  
317 2012). In this case, the taller plants had less dew formation because artificial infrared  
318 heating made the temperature of the taller canopy higher than that of the lower  
319 canopy (Xiao et al., 2013). Warming indirectly caused the soil moisture to evaporate  
320 more quickly during the night (Tomaszkiewicz et al., 2015; Li et al., 2018). Therefore,  
321 the shorter plants experienced more dew collection than the higher plants during the  
322 night under warming conditions. Clearly, warming influenced the dew formation on  
323 plants and changed the ecosystem processes compared with those under natural  
324 conditions.

325 *4.3. Infrared heater warming system reduces dew formation: An*  
326 *overlooked factor in climate change studies*

327       There have been many studies about the response of ecosystem processes to  
328 climate change using various artificial warming methods in dry ecosystems (Kimball  
329 et al., 2018; Song et al., 2019; Korell et al., 2019), but the possible impacts from the  
330 differences between artificial and natural warming on the experimental results have  
331 often been overlooked. Our results showed that artificial warming (with an infrared  
332 heater warming system) affects dew formation, which likely affects ecosystem  
333 processes (Liu et al., 2016). However, it is worth noting that natural climate warming  
334 and the infrared heater warming system differ in terms of their heat-dissipating  
335 pathways (Korell et al., 2019). Artificial warming generates more heat radiation in the  
336 air and drier micro-environments than natural warming (Liu et al., 2018). This  
337 difference will affect a number of ecosystem processes and is often overlooked across  
338 simulated climate change experiments. Warming makes plants grow taller (Liu et al.,  
339 2018), but taller plants produced less dew under warming in our study (Fig. 3). This  
340 indicates that the dew formation was significantly reduced under the experimental  
341 warming conditions. In addition, the relationship between dew formation and plant  
342 height changed being positively correlated under the control treatment to being  
343 negatively correlated under the warming treatment (Fig. 4). For such cases, the  
344 conclusions of the impacts of warming obtained by artificial warming experiments  
345 may deviate from the actual impacts of warming on ecosystem processes. Under  
346 future climate warming, the changes in water condensation will also have an

347 especially profound impact on the ecosystem patterns and processes in dryland  
348 ecosystems (Li et al., 2018; Wang et al., 2017b). Therefore, we suggest that the  
349 impact of experimental warming on dew formation should be considered an important  
350 environmental factor affecting ecosystems processes during climate warming.

351

## 352 **5. Conclusions**

353 Using three measurement methods, we observed that warming significantly  
354 reduced the dew amount and duration and changed its seasonal patterns. Different  
355 plant functional groups had different effects on dew formation due to their associated  
356 microclimates and plant heights, resulting in taller plants experiencing more dew  
357 formation. However, artificial warming caused the taller plants to have less dew  
358 formation due to the associated heat radiation. We also found that infrared heater  
359 warming systems markedly reduced dew formation, which should be addressed to  
360 avoid overestimating the impact of climate warming on ecosystems during global  
361 change studies. Our study demonstrates that dew condensation responds to climate  
362 warming and highlights that microhabitat conditions and plant traits mediate dew  
363 formation under warming conditions, having an important potential effect on  
364 ecosystems processes in the future.

365

## 366 **Authors' contributions**

367 Jin-sheng He conceived the ideas and designed methodology; Lixu Zhang and  
368 Qian Chen collected the data; Lixu Zhang, Zhiyuan Ma, Zijian Shangguan, Hao Wang

369 and Tianjiao Feng analysed the data; Lixu Zhang and Tianjiao Feng led the writing of  
370 the manuscript with the assistances from Lixin Wang. All authors contributed  
371 critically to the drafts and gave final approval for publication.

372

### 373 **Acknowledgments**

374 This research was funded by the National Natural Science Foundation of China  
375 (31630009, 31621091), and the 111 Project (Grant No. B14001). We sincerely thank  
376 the contribution and assistance of Haibei National Field Research Station of Alpine  
377 Grassland Ecosystem.

378

### 379 **References**

- 380 Agam, N., and P. R. Berliner. 2006. Dew formation and water vapor adsorption in  
381 semi-arid environments--A review. *Journal of Arid Environments* **65**:572–590.
- 382 Allen, R. G., L. S. Pereira, D. Raes, and Smith M. 1998. *Crop evapotranspiration :*  
383 *guidelines for computing crop water requirements.* Food and Agriculture  
384 Organization of the United Nations, Rome.
- 385 Benasher, J., P. Alpert, and A. Benzvi. 2010. Dew is a major factor affecting  
386 vegetation water use efficiency rather than a source of water in the eastern  
387 Mediterranean area. *Water Resources Research* **46**:437-441.
- 388 Beysens, D. 1995. The formation of dew. *Atmospheric Research* **39**:215-237.
- 389 Beysens, D. 2016. Estimating dew yield worldwide from a few meteo data.  
390 *Atmospheric Research* **167**:146-155.

- 391 Chen, Q. 2015. Hydrological processes and their response to warming and altered  
392 precipitation in an alpine meadow on the Tibetan Plateau (Master's thesis).  
393 Peking University, Beijing.
- 394 De Boeck, H. J., S. Vicca, J. Roy, I. Nijs, A. Milcu, J. Kreyling, A. Jentsch, A. Chabbi,  
395 M. Campioli, T. Callaghan, C. Beierkuhnlein, and C. Beier. 2015. Global  
396 Change Experiments: Challenges and Opportunities. *BioScience* **65**:922-931.
- 397 Ettinger, A. K., I. Chuine, B. I. Cook, J. S. Dukes, A. M. Ellison, M. R. Johnston, A.  
398 M. Panetta, C. R. Rollinson, Y. Vitasse, E. M. Wolkovich, and E. Jeffers. 2019.  
399 How do climate change experiments alter plot-scale climate? *Ecology Letters*  
400 **22**:748-763.
- 401 Fischer, T., M. Veste, O. Bens, and R. F. Huttl. 2012. Dew formation on the surface of  
402 biological soil crusts in central European sand ecosystems. *Biogeosciences*  
403 **9**:4621-4628.
- 404 Goldsmith, G. R., N. J. Matzke, and T. E. Dawson. 2013. The incidence and  
405 implications of clouds for cloud forest plant water relations. *Ecology Letters*  
406 **16**:307-314.
- 407 Hao, X., C. Li, B. Guo, J. Ma, M. Ayup, and Z. Chen. 2012. Dew formation and its  
408 long-term trend in a desert riparian forest ecosystem on the eastern edge of the  
409 Taklimakan Desert in China. *Journal of Hydrology* **472-473**:90-98.
- 410 Jacobs, A. F. G., B. G. Heusinkveld, R. J. W. Kruit, and S. M. Berkowicz. 2006.  
411 Contribution of dew to the water budget of a grassland area in the  
412 Netherlands. *Water Resources Research* **42**:446-455.

- 413 Kidron, G. J., and M. Temina. 2013. The Effect of Dew and Fog on Lithic Lichens  
414 Along an Altitudinal Gradient in the Negev Desert. *Geomicrobiology Journal*  
415 **30**:281-290.
- 416 Kimball, B. A., A. M. Alonso-Rodriguez, M. A. Cavaleri, S. C. Reed, G. Gonzalez,  
417 and T. E. Wood. 2018. Infrared heater system for warming tropical forest  
418 understory plants and soils. *Ecology Evolution* **8**:1932-1944.
- 419 Konrad, W., J. Burkhardt, M. Ebner, and A. Roth-Nebelsick. 2015. Leaf pubescence  
420 as a possibility to increase water use efficiency by promoting condensation.  
421 *Ecohydrology* **8**:480-492.
- 422 Korell, L., H. Auge, J. M. Chase, W. S. Harpole, and T. M. Knight. 2019. We need  
423 more realistic climate change experiments for understanding ecosystems of the  
424 future. *Globe Change Biology*. doi: 10.1111/gcb.14797.
- 425 Li, X. R., R. L. Jia, Z. S. Zhang, P. Zhang, and R. Hui. 2018. Hydrological response  
426 of biological soil crusts to global warming: A ten-year simulative study.  
427 *Global Change Biology* **24**:4960-4971.
- 428 Lin, L., B. Zhu, C. Chen, Z. Zhang, Q. B. Wang, and J. S. He. 2016. Precipitation  
429 overrides warming in mediating soil nitrogen pools in an alpine grassland  
430 ecosystem on the Tibetan Plateau. *Scitific Reports* **6**:31438.
- 431 Liu, H. Y., Z. R. Mi, L. Lin, Y. H. Wang, Z. H. Zhang, F. W. Zhang, H. Wang, L. L.  
432 Liu, B. A. Zhu, G. M. Cao, X. Q. Zhao, N. J. Sanders, A. T. Classen, P. B.  
433 Reich, and J. S. He. 2018. Shifting plant species composition in response to  
434 climate change stabilizes grassland primary production. *Proceedings of the*

- 435 National Academy of Sciences of the United States of America **115**:4051-  
436 4056.
- 437 Liu, L. L., X. Wang, M. J. Lajeunesse, G. F. Miao, S. L. Piao, S. Q. Wan, Y. X. Wu, Z.  
438 H. Wang, S. Yang, P. Li, and M. F. Deng. 2016. A cross-biome synthesis of  
439 soil respiration and its determinants under simulated precipitation changes.  
440 *Global Change Biology* **22**:1394-1405.
- 441 Li, X. R., R. L. Jia, Z. S. Zhang, P. Zhang, and R. Hui. 2018. Hydrological response  
442 of biological soil crusts to global warming: A ten-year simulative study.  
443 *Global Change Biology* **24**:4960-4971.
- 444 Ma, Z., H. Liu, Z. Mi, Z. Zhang, Y. Wang, W. Xu, L. Jiang, and J. S. He. 2017.  
445 Climate warming reduces the temporal stability of plant community biomass  
446 production. *Nature Communication* **8**:15378.
- 447 Moni, C., H. Silvennoinen, B. A. Kimball, E. Fjellidal, M. Brenden, I. Burud, A. Flo,  
448 and D. P. Rasse. 2019. Controlled infrared heating of an arctic meadow:  
449 challenge in the vegetation establishment stage. *Plant Methods* **15**:1-12.
- 450 Mortuza, M. R., S. Selmi, M. M. Khudri, A. K. Ankur, and M. M. Rahman. 2014.  
451 Evaluation of temporal and spatial trends in relative humidity and dew point  
452 temperature in Bangladesh. *Arabian Journal of Geosciences* **7**:5037-5050.
- 453 Munné, S. 1999. Role of Dew on the Recovery of Water-Stressed *Melissa officinalis*  
454 L. Plants. *Animal Behaviour* **72**:1405-1416.
- 455 Ninari, N., and P. R. Berliner. 2002. The role of dew in the water and heat balance of  
456 bare loess soil in the Negev Desert: quantifying the actual dew deposition on



- 457 the soil surface. *Atmospheric Research* **64**:323-334.
- 458 Oliveira, R. S. 2013. Foliar uptake of fog water and transport belowground alleviates  
459 drought effects in the cloud forest tree species, *Drimys brasiliensis*  
460 (Winteraceae). *New Phytologist* **199**:151-162.
- 461 Pan, Y. X., X. P. Wang, and Y. F. Zhang. 2010. Dew formation characteristics in a  
462 revegetation-stabilized desert ecosystem in Shapotou area, Northern China.  
463 *Journal of Hydrology* **387**:265-272.
- 464 Rodney, E. W., M. W. Stuart, B. Z. Chris, and C. H. Thomas. 2013. Increased vapor  
465 pressure deficit due to higher temperature leads to greater transpiration and  
466 faster mortality during drought for tree seedlings common to the forest-  
467 grassland ecotone. *The New Phytologist* **200**:366-374.
- 468 Scheff, J., and D. M. W. Frierson. 2014. Scaling Potential Evapotranspiration with  
469 Greenhouse Warming. *Journal of Climate* **27**:1539-1558.
- 470 Shaver GR, Canadell J, Chapin FS III, Gurevitch J, Harte J, Henry G, Ineson P,  
471 Jonasson S, Melillo J, Pitelka L, Rustad L .2000. Climate warming and  
472 terrestrial ecosystems: a conceptual framework for analysis. *Bioscience* **50**:  
473 871-882.
- 474 Song, J., S. Wan, S. Piao, A. K. Knapp, A. T. Classen, S. Vicca, P. Ciais, M. J.  
475 Hovenden, S. Leuzinger, C. Beier, P. Kardol, J. Y. Xia, Q. Liu, J. Y. Ru, Z. X.  
476 Zhou, Y. Q. Luo, D. L. Guo, J. A. Langley, J. Zscheischler, J. S. Dukes, J. W.  
477 Tang, J. Q. Chen, K. S. Hofmockel, L. M. Kueppers, L. Rustad, L. L. Liu, M.  
478 D. Smith, P. H. Templer, R. Q. Thomas, R. J. Norby, R. P. Phillips, S. L. Niu,

- 479 S. Fatichi, Y. P. Wang, P. S. Shao, H. Y. Han, D. D. Wang, L. J. Lei, J. L.  
480 Wang, X. N. Li, Q. Zhang, X. M. Li, F. L. Su, B. Liu, F. Yang, G. G. Ma, G. Y.  
481 Li, Y. C. Liu, Y. Z. Liu, Z. L. Yang, K. S. Zhang, Y. Miao, M. J. Hu, C. Yan, A.  
482 Zhang, M. X. Zhong, Y. Hui, Y. Li, and M. M. Zheng. 2019. A meta-analysis  
483 of 1,119 manipulative experiments on terrestrial carbon-cycling responses to  
484 global change. *Nature Ecology & Evolution* **3**:1309-1320.
- 485 Steinberger, Y., I. Loboda, and W. Garner. 1989. The influence of autumn dewfall on  
486 spatial and temporal distribution of nematodes in the desert ecosystem. *Journal*  
487 *of Arid Environments* **16**:177-183.
- 488 Stone, E. C. 1957. Dew as an Ecological Factor: I. A Review of the Literature.  
489 *Ecology* **38**:407-413.
- 490 Tomasziewicz, M., M. Abou Najm, D. Beysens, I. Alameddine, and M. El-Fadel.  
491 2015. Dew as a sustainable non-conventional water resource: a critical review.  
492 *Environmental Reviews* **23**:425-442.
- 493 Tomasziewicz, M., M. A. Najm, R. Zurayk, and M. El-Fadel. 2017. Dew as an  
494 adaptation measure to meet water demand in agriculture and reforestation.  
495 *Agricultural & Forest Meteorology* **232**:411-421.
- 496 Tomasziewicz, M., M. Abou Najm, D. Beysens, I. Alameddine, E. B. Zeid, and M.  
497 El-Fadel. 2016. Projected climate change impacts upon dew yield in the  
498 Mediterranean basin. *Science of the Total Environment* **566**:1339-1348.
- 499 Vuollekoski, H., M. Vogt, V. A. Sinclair, J. Duplissy, H. Järvinen, E. M. Kyrö, R.  
500 Makkonen, T. Petäjä, N. L. Prisle, and P. Räisänen. 2015. Estimates of global

501 dew collection potential on artificial surfaces. *Hydrology & Earth System*  
502 *Sciences* **11**:601-613.

503 Walther, G. R., E. Post, P. Convey, A. Menzel, C. Parmesan, T. J. C. Beebee, J. M.  
504 Fromentin, O. Hoegh-Guldberg, and F. Bairlein. 2002. Ecological responses to  
505 recent climate change. *Nature* **416**:389-395.

506 Wang, L., K. F. Kaseke, and M. K. Seely. 2017a. Effects of non-rainfall water inputs  
507 on ecosystem functions. *Wiley Interdisciplinary Reviews: Water* **4**:e1179.

508 Wang, L., K. F. Kaseke, S. Ravi, W. Jiao, R. Mushi, T. Shuuya, and G. Maggs-  
509 Kölling. 2019. Convergent vegetation fog and dew water use in the Namib  
510 Desert. *Ecohydrology*. DOI: 10.1002/eco.2130.

511 Wang, J., L. Liu, X. Wang, S. Yang, B. Zhang, P. Li, C. Qiao, M. Deng, W. Liu, and  
512 K. Treseder. 2017b. High night-time humidity and dissolved organic carbon  
513 content support rapid decomposition of standing litter in a semi-arid  
514 landscape. *Functional Ecology* **31**:1659-1668.

515 Wang, G., G. Liu, and C. Li. 2012. Effects of changes in alpine grassland vegetation  
516 cover on hillslope hydrological processes in a permafrost watershed. *Journal*  
517 *of Hydrology* **444**:22-33.

518 Wolkovich, E. M., B. I. Cook, J. M. Allen, T. M. Crimmins, J. L. Betancourt, S. E.  
519 Travers, S. Pau, J. Regetz, T. J. Davies, N. J. B. Kraft, T. R. Ault, K.  
520 Bolmgren, S. J. Mazer, G. J. McCabe, B. J. McGill, C. Parmesan, N. Salamin,  
521 M. D. Schwartz, and E. E. Cleland. 2012. Warming experiments underpredict  
522 plant phenological responses to climate change. *Nature* **485**:494-497.

- 523 Xiao, H., R. Meissner, J. Seeger, H. Rupp, H. Borg, and Y. Zhang. 2013. Analysis of  
524 the effect of meteorological factors on dewfall. *Science of the Total*  
525 *Environment* **452-453**:384-393.
- 526 Xu, Y., B. Yan, and J. Tang. 2015. The Effect of Climate Change on Variations in Dew  
527 Amount in a Paddy Ecosystem of the Sanjiang Plain, China. *Advances in*  
528 *Meteorology* **9** :1-9.
- 529 Zhang, J., Y. M. Zhang, A. Downing, J. H. Cheng, X. B. Zhou, and B. C. Zhang.  
530 2009. The influence of biological soil crusts on dew deposition in  
531 Gurbantunggut Desert, Northwestern China. *Journal of Hydrology* **379**:220-  
532 228.
- 533 Zheng, Y., H. Bai, Z. Huang, X. Tian, F. Q. Nie, Y. Zhao, J. Zhai, and L. Jiang. 2010.  
534 Directional water collection on wetted spider silk. *Nature* **463**:640-643.
- 535 Zhuang, Y., and S. Ratcliffe. 2012. Relationship between dew presence and *Bassia*  
536 *dasyphylla* plant growth. *Journal of Arid Land* **4**:11-18.
- 537 Zhuang, Y. L., and W. Z. Zhao. 2017. Dew formation and its variation in *Haloxylon*  
538 *ammodendron* plantations at the edge of a desert oasis, northwestern China.  
539 *Agricultural and Forest Meteorology* **247**:541-550.

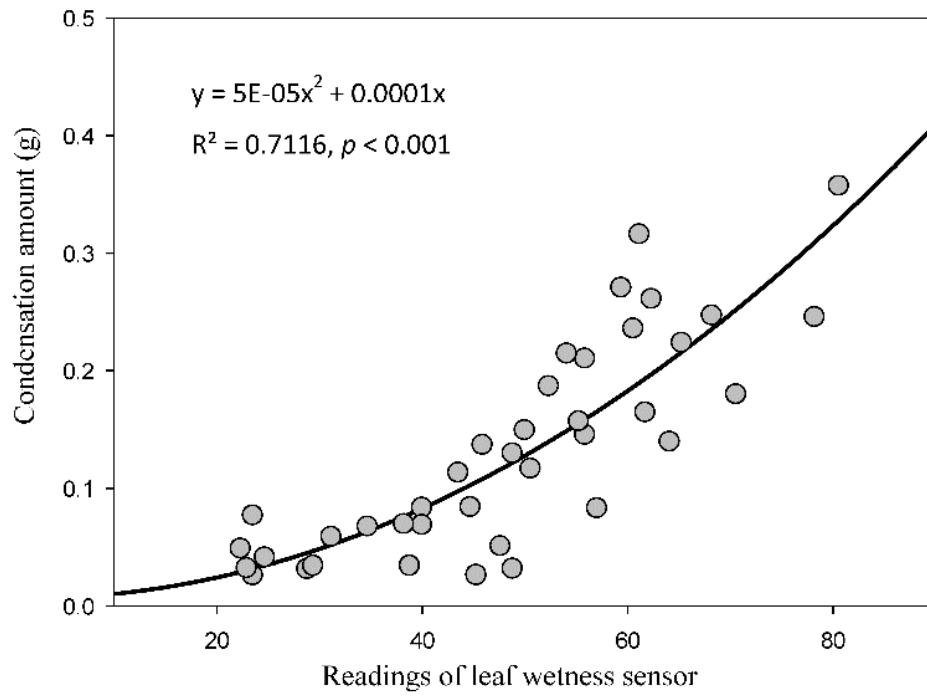

540

541 Fig. S1 Fitting curve of the readings of leaf wetness sensor and condensation amount

542
